# Supplementary material
Source: PubMed Central journal article supplement (PMC4031515)
Supplement: supp_M114.560573_jbc.M114.560573-1.pdf [file supp_M114.560573_jbc.M114.560573-1.pdf]

## **Supplemental Information**

### **Therapeutic efficacy of stable analogues of Vasoactive Intestinal**

### **Peptide against pathogens**

Jenny Campos-Salinas, Antonio Cavazzuti, Francisco O'Valle, Irene Forte-Lago, Marta Caro,

Stephen M. Beverley, Mario Delgado and Elena Gonzalez-Rey

Files in this Data Supplement: Supplemental figure 1 and Tables S1 to S6

## Supplemental Figures

**Figure S1.** Structural properties of native VIP, VIP51 and VIP51<sub>(6-30)</sub>. For each peptide, top images: ribbon schemes with side chains of amino acids; bottom images: predicted molecular surface model showing theoretical distribution of charges in the surface. The molecular modelling of VIP and VIP derivatives was resolved in the I-TASSER server. Distribution of charged amino acids in ribbon models and in 3D surfaces was visualized using the Pisson-Boltzman algorithm of Swiss Protein Data Bank viewer v4.0.4 (<http://spdbv.vital-it.ch/refs.html>). Negative residues (red), positive residues (dark-blue), polar residues (pink), and apolar residues (light-blue).

### VIP

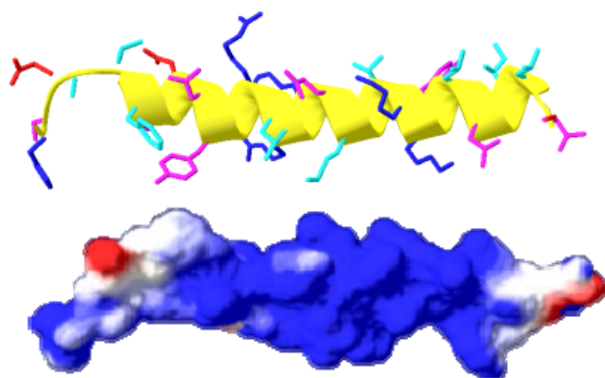

### VIP51

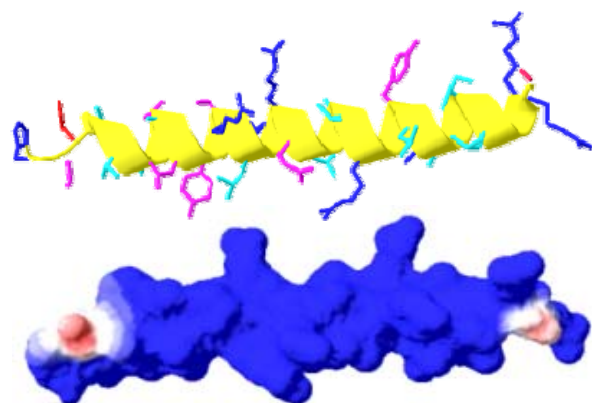

■ negative  
■ positive  
■ polar  
■ apolar  
□ neutral

### VIP51<sub>(6-30)</sub>

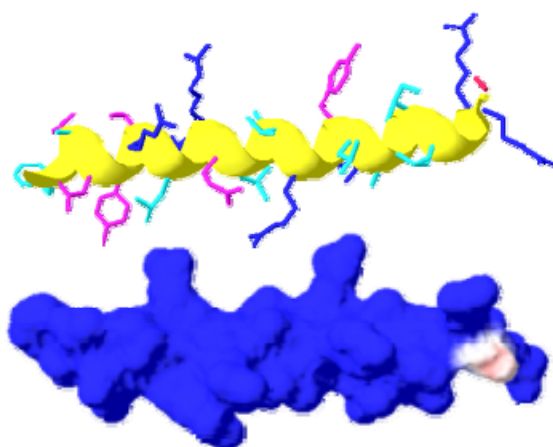

**Table S1.** Specific hydrogen-bonding contacts between VIP and D21''Ra''

| Position <sup>a</sup> | VIP                      | FTT | PO4 | DPO | PA1 | GCN | KDO | GMH | GLC | GLA | $\Sigma$ Aa <sup>b</sup> | %Aa <sup>c</sup> |
|-----------------------|--------------------------|-----|-----|-----|-----|-----|-----|-----|-----|-----|--------------------------|------------------|
| 1                     | H                        |     |     |     |     |     |     |     |     |     |                          |                  |
| 2                     | S                        |     |     |     |     |     |     |     |     |     |                          |                  |
| 3                     | D                        |     |     |     |     |     |     |     | 2   | 1   | 3                        | 10.3             |
| 4                     | A                        |     |     |     |     |     |     |     |     |     |                          |                  |
| 5                     | V                        |     |     |     |     |     |     |     |     |     |                          |                  |
| 6                     | F                        |     |     |     |     |     |     |     |     |     |                          |                  |
| 7                     | T                        |     |     |     |     | 1   | 2   |     |     |     | 3                        | 10.3             |
| 8                     | D                        |     |     |     |     |     | 1   |     |     |     | 1                        | 3.4              |
| 9                     | N                        |     |     |     |     |     |     |     |     |     |                          |                  |
| 10                    | Y                        |     |     |     |     |     |     |     |     |     |                          |                  |
| 11                    | T                        |     |     | 1   |     |     | 2   |     | 1   |     | 4                        | 13.8             |
| 12                    | R                        |     |     | 2   |     |     |     |     | 1   |     | 3                        | 10.3             |
| 13                    | L                        |     |     |     |     |     |     |     |     |     |                          |                  |
| 14                    | R                        | 3   | 3   | 1   |     |     |     | 1   |     |     | 8                        | 27.6             |
| 15                    | K                        | 1   | 1   |     | 2   |     |     |     | 2   |     | 6                        | 20.7             |
| 16                    | Q                        | 1   |     |     |     |     |     |     |     |     | 1                        | 3.4              |
| 17                    | M                        |     |     |     |     |     |     |     |     |     |                          |                  |
| 18                    | A                        |     |     |     |     |     |     |     |     |     |                          |                  |
| 19                    | V                        |     |     |     |     |     |     |     |     |     |                          |                  |
| 20                    | K                        |     |     |     |     |     |     |     |     |     |                          |                  |
| 21                    | K                        |     |     |     |     |     |     |     |     |     |                          |                  |
| 22                    | Y                        |     |     |     |     |     |     |     |     |     |                          |                  |
| 23                    | L                        |     |     |     |     |     |     |     |     |     |                          |                  |
| 24                    | N                        |     |     |     |     |     |     |     |     |     |                          |                  |
| 25                    | S                        |     |     |     |     |     |     |     |     |     |                          |                  |
| 26                    | I                        |     |     |     |     |     |     |     |     |     |                          |                  |
| 27                    | L                        |     |     |     |     |     |     |     |     |     |                          |                  |
| 28                    | N                        |     |     |     |     |     |     |     |     |     |                          |                  |
|                       | $\Sigma$ Ch <sup>d</sup> | 5   | 4   | 4   | 2   | 1   | 5   | 1   | 6   | 1   |                          |                  |
|                       | %Ch <sup>e</sup>         | 17  | 14  | 14  | 7   | 3   | 17  | 3   | 21  | 3   |                          |                  |

<sup>a</sup> Position of each amino acid in the sequence of the VIP molecule.<sup>b</sup> Summation of hydrogen-bonding contacts between specific amino acids of VIP and D21''Ra''.<sup>c</sup> % of total hydrogen-bonding amino acid implicated in the interaction between VIP and D21''Ra''.<sup>d</sup> Summation of the total of hydrogen-bonding implicated in the interaction between each carbohydrate residue with VIP.<sup>e</sup> % of total hydrogen-bonding carbohydrate residue implicated in the interaction with VIP.

**Table S2.** Specific hydrogen-bonding contacts between VIP51 and D21''Ra''.

| Position <sup>a</sup> | VIP51            | FTT | PO4 | DPO | PA1 | GCN | KDO | GMH | GLC | GLA | $\Sigma Aa^b$ | %Aa <sup>c</sup> |
|-----------------------|------------------|-----|-----|-----|-----|-----|-----|-----|-----|-----|---------------|------------------|
| 1                     | H                |     |     |     |     |     |     |     | 1   |     | 1             | 2.6              |
| 2                     | S                |     |     |     |     |     |     |     | 4   | 2   | 6             | 15.8             |
| 3                     | D                |     |     |     |     |     |     |     |     |     |               |                  |
| 4                     | A                |     |     |     |     |     |     |     |     |     |               |                  |
| 5                     | V                |     |     |     |     |     |     |     |     | 1   | 1             | 2.6              |
| 6                     | F                |     |     |     |     |     |     |     |     |     |               |                  |
| 7                     | T                |     |     |     |     |     |     |     |     |     |               |                  |
| 8                     | A                | 1   |     |     |     |     |     |     |     |     | 1             | 2.6              |
| 9                     | N                |     |     | 6   |     |     |     |     |     |     | 6             | 15.8             |
| 10                    | Y                |     |     |     |     |     |     |     |     |     |               |                  |
| 11                    | T                |     |     |     | 1   |     |     |     |     |     | 1             | 2.6              |
| 12                    | R                | 7   | 2   | 1   | 1   |     | 3   |     |     |     | 14            | 36.8             |
| 13                    | L                |     |     |     |     |     |     |     |     |     |               |                  |
| 14                    | R                |     | 2   |     |     |     |     |     |     |     | 2             | 5.3              |
| 15                    | R                |     |     | 1   |     |     | 3   |     | 1   |     | 5             | 13.2             |
| 16                    | Q                | 1   |     |     |     |     |     |     |     |     | 1             | 2.6              |
| 17                    | L                |     |     |     |     |     |     |     |     |     |               |                  |
| 18                    | A                |     |     |     |     |     |     |     |     |     |               |                  |
| 19                    | V                |     |     |     |     |     |     |     |     |     |               |                  |
| 20                    | R                |     |     |     |     |     |     |     |     |     |               |                  |
| 21                    | R                |     |     |     |     |     |     |     |     |     |               |                  |
| 22                    | Y                |     |     |     |     |     |     |     |     |     |               |                  |
| 23                    | L                |     |     |     |     |     |     |     |     |     |               |                  |
| 24                    | A                |     |     |     |     |     |     |     |     |     |               |                  |
| 25                    | A                |     |     |     |     |     |     |     |     |     |               |                  |
| 26                    | I                |     |     |     |     |     |     |     |     |     |               |                  |
| 27                    | L                |     |     |     |     |     |     |     |     |     |               |                  |
| 28                    | G                |     |     |     |     |     |     |     |     |     |               |                  |
| 29                    | R                |     |     |     |     |     |     |     |     |     |               |                  |
| 30                    | R                |     |     |     |     |     |     |     |     |     |               |                  |
|                       | $\Sigma Ch^d$    | 9   | 4   | 8   | 2   | 0   | 6   | 0   | 6   | 3   |               |                  |
|                       | %Ch <sup>e</sup> | 24  | 11  | 21  | 5   | 0   | 16  | 0   | 16  | 8   |               |                  |

<sup>a</sup> Position of each amino acid in the sequence of the VIP51 molecule.

<sup>b</sup> Summation of hydrogen-bonding contacts between specific amino acids of VIP51 and D21''Ra''.

<sup>c</sup> % of total hydrogen-bonding amino acid implicated in the interaction between VIP51 and D21''Ra''.

<sup>d</sup> Summation of the total of hydrogen-bonding implicated in the interaction between each carbohydrate residue with VIP51.

<sup>e</sup> % of total hydrogen-bonding carbohydrate residue implicated in the interaction with VIP51.

**Table S3.** Specific hydrogen-bonding contacts between VIP51<sub>(6-30)</sub> and D21''Ra''.

| Position <sup>a</sup> | VIP51 <sub>(6-30)</sub> | FTT | PO4 | DPO | PA1 | GCN | KDO | GMH | GLC | GLA | $\Sigma Aa^b$ | %Aa <sup>c</sup> |
|-----------------------|-------------------------|-----|-----|-----|-----|-----|-----|-----|-----|-----|---------------|------------------|
| 6                     | F                       |     |     |     |     |     |     |     |     |     |               |                  |
| 7                     | T                       |     |     |     |     |     |     |     |     |     |               |                  |
| 8                     | A                       |     |     |     |     |     |     |     | 1   |     | 1             | 2                |
| 9                     | N                       |     |     |     |     |     |     |     |     | 1   | 1             | 2                |
| 10                    | Y                       |     |     |     |     |     |     |     |     | 1   | 1             | 2                |
| 11                    | T                       |     |     |     |     |     | 1   |     | 1   |     | 2             | 4                |
| 12                    | R                       | 1   |     | 2   | 2   |     | 3   |     |     |     | 8             | 16               |
| 13                    | L                       |     |     |     |     |     |     |     |     |     |               |                  |
| 14                    | R                       |     |     |     | 1   |     | 2   |     | 1   | 2   | 6             | 12               |
| 15                    | R                       | 1   | 2   | 1   |     | 1   | 10  |     | 5   |     | 20            | 40               |
| 16                    | Q                       | 1   |     |     |     |     | 1   |     |     |     | 2             | 4                |
| 17                    | L                       |     |     |     |     |     |     |     |     |     |               |                  |
| 18                    | A                       |     |     |     |     |     |     |     |     |     |               |                  |
| 19                    | V                       |     |     |     |     |     |     |     |     |     |               |                  |
| 20                    | R                       |     |     | 1   |     |     | 2   | 1   |     |     | 4             | 8                |
| 21                    | R                       | 1   |     |     |     |     | 2   |     |     |     | 3             | 6                |
| 22                    | Y                       |     |     |     |     |     |     |     |     |     |               |                  |
| 23                    | L                       |     |     |     |     |     |     |     |     |     |               |                  |
| 24                    | A                       |     |     |     |     |     |     |     |     |     |               |                  |
| 25                    | A                       |     |     |     |     |     |     |     |     |     |               |                  |
| 26                    | I                       |     |     |     |     |     |     |     |     |     |               |                  |
| 27                    | L                       |     |     |     |     |     |     |     |     |     |               |                  |
| 28                    | G                       |     |     |     |     |     |     |     |     |     |               |                  |
| 29                    | R                       | 1   |     |     |     |     |     |     | 1   |     | 2             | 4                |
| 30                    | R                       |     |     |     |     |     |     |     |     |     |               |                  |
|                       | $\Sigma Ch^d$           | 5   | 2   | 4   | 3   | 1   | 21  | 1   | 9   | 4   |               |                  |
|                       | %Ch <sup>e</sup>        | 10  | 4   | 8   | 6   | 2   | 42  | 2   | 18  | 8   |               |                  |

<sup>a</sup> Position of each amino acid in the sequence of the VIP51<sub>(6-30)</sub> molecule.<sup>b</sup> Summation of hydrogen-bonding contacts between specific amino acids of VIP51<sub>(6-30)</sub> and D21''Ra''.<sup>c</sup> % of total hydrogen-bonding amino acid implicated in the interaction between VIP51<sub>(6-30)</sub> and D21''Ra''.<sup>d</sup> Summation of the total of hydrogen-bonding implicated in the interaction between each carbohydrate residue with VIP51<sub>(6-30)</sub>.<sup>e</sup> % of total hydrogen-bonding carbohydrate residue implicated in the interaction with VIP51<sub>(6-30)</sub>.

**Table S4.** Specific hydrogen-bonding contacts between VIP and D21f2''Rd''

| Position <sup>a</sup> | VIP              | FTT | PO4 | DPO | PA1 | GCN | KDO | $\Sigma Aa^b$ | %Aa <sup>c</sup> |
|-----------------------|------------------|-----|-----|-----|-----|-----|-----|---------------|------------------|
| 1                     | H                |     |     |     |     |     |     |               |                  |
| 2                     | S                |     |     |     |     |     |     |               |                  |
| 3                     | D                |     |     |     |     |     | 2   | 2             | 5.6              |
| 4                     | A                |     |     |     |     |     |     |               |                  |
| 5                     | V                |     |     |     |     |     |     |               |                  |
| 6                     | F                |     |     |     |     |     |     |               |                  |
| 7                     | T                | 1   |     |     |     |     |     | 1             | 2.8              |
| 8                     | D                | 2   |     |     |     |     |     | 2             | 5.6              |
| 9                     | N                |     |     |     |     |     |     |               |                  |
| 10                    | Y                |     |     |     |     |     |     |               |                  |
| 11                    | T                | 5   |     |     |     | 1   |     | 6             | 16.7             |
| 12                    | R                | 4   |     |     |     |     | 7   | 11            | 30.6             |
| 13                    | L                |     |     |     |     |     |     |               |                  |
| 14                    | R                | 1   | 1   | 2   | 2   |     | 5   | 11            | 30.6             |
| 15                    | K                |     |     | 1   |     |     | 1   | 2             | 5.6              |
| 16                    | Q                |     |     |     |     |     |     |               |                  |
| 17                    | M                |     |     |     |     |     |     |               |                  |
| 18                    | A                |     |     |     |     |     |     |               |                  |
| 19                    | V                |     |     |     |     |     |     |               |                  |
| 20                    | K                |     |     |     |     |     |     |               |                  |
| 21                    | K                |     |     | 1   |     |     |     | 1             | 2.8              |
| 22                    | Y                |     |     |     |     |     |     |               |                  |
| 23                    | L                |     |     |     |     |     |     |               |                  |
| 24                    | N                |     |     |     |     |     |     |               |                  |
| 25                    | S                |     |     |     |     |     |     |               |                  |
| 26                    | I                |     |     |     |     |     |     |               |                  |
| 27                    | L                |     |     |     |     |     |     |               |                  |
| 28                    | N                |     |     |     |     |     |     |               |                  |
|                       | $\Sigma Ch^d$    | 13  | 1   | 4   | 2   | 1   | 15  |               |                  |
|                       | %Ch <sup>e</sup> | 36  | 3   | 11  | 6   | 3   | 42  |               |                  |

<sup>a</sup> Position of each amino acid in the sequence of the VIP molecule.<sup>b</sup> Summation of hydrogen-bonding contacts between specific amino acids of VIP and D21F2''Rd''.<sup>c</sup> % of total hydrogen-bonding amino acid implicated in the interaction between VIP and D21f2''Rd''.<sup>d</sup> Summation of the total of hydrogen-bonding implicated in the interaction between each carbohydrate residue with VIP.<sup>e</sup> % of total hydrogen-bonding carbohydrate residue implicated in the interaction with VIP.

**Table S5.** Specific hydrogen-bonding contacts between VIP51 and D21f2”Rd”

| Position <sup>a</sup> | VIP51            | FTT | PO4 | DPO | PA1 | GCN | KDO | $\Sigma Aa^b$ | %Aa <sup>c</sup> |
|-----------------------|------------------|-----|-----|-----|-----|-----|-----|---------------|------------------|
| 1                     | H                | 2   |     |     |     |     | 3   | 5             | 11.4             |
| 2                     | S                | 1   |     |     |     |     | 1   | 2             | 4.5              |
| 3                     | D                |     |     |     |     | 1   | 1   | 2             | 4.5              |
| 4                     | A                |     |     |     |     |     |     |               |                  |
| 5                     | V                |     |     |     |     |     | 1   | 1             | 2.3              |
| 6                     | F                |     |     |     |     |     |     |               |                  |
| 7                     | T                |     |     |     |     |     |     |               |                  |
| 8                     | A                |     |     |     |     |     | 1   | 1             | 2.3              |
| 9                     | N                |     |     | 4   | 1   |     | 3   | 8             | 18.2             |
| 10                    | Y                |     |     |     |     |     |     |               |                  |
| 11                    | T                | 1   |     |     |     |     |     | 1             | 2.3              |
| 12                    | R                | 3   |     |     |     |     | 1   | 4             | 9.1              |
| 13                    | L                |     |     |     |     |     |     |               |                  |
| 14                    | R                | 3   |     |     |     |     |     | 3             | 6.8              |
| 15                    | R                |     |     |     | 1   | 1   | 1   | 3             | 6.8              |
| 16                    | Q                |     |     |     |     |     |     |               |                  |
| 17                    | L                |     |     |     |     |     |     |               |                  |
| 18                    | A                |     |     |     |     |     |     |               |                  |
| 19                    | V                |     |     |     |     |     |     |               |                  |
| 20                    | R                |     |     |     |     |     |     |               |                  |
| 21                    | R                |     |     | 1   | 1   | 1   | 7   | 10            | 22.7             |
| 22                    | Y                | 1   |     |     |     |     |     | 1             | 2.3              |
| 23                    | L                |     |     |     |     |     |     |               |                  |
| 24                    | A                |     |     |     |     |     |     |               |                  |
| 25                    | A                |     |     |     |     |     |     |               |                  |
| 26                    | I                |     |     |     |     |     |     |               |                  |
| 27                    | L                |     |     |     |     |     |     |               |                  |
| 28                    | G                |     |     |     |     |     |     |               |                  |
| 29                    | R                | 2   | 1   |     |     |     |     | 3             | 6.8              |
| 30                    | R                |     |     |     |     |     |     |               |                  |
|                       | $\Sigma Ch^d$    | 13  | 1   | 5   | 3   | 3   | 19  |               |                  |
|                       | %Ch <sup>e</sup> | 31  | 2   | 11  | 7   | 7   | 43  |               |                  |

<sup>a</sup> Position of each amino acid in the sequence of the VIP51 molecule.<sup>b</sup> Summation of hydrogen-bonding contacts between specific amino acids of VIP51 and D21f2”Rd”.<sup>c</sup> % of total hydrogen-bonding amino acid implicated in the interaction between VIP51 and D21f2”Rd”.<sup>d</sup> Summation of the total of hydrogen-bonding implicated in the interaction between each carbohydrate residue with VIP51.<sup>e</sup> % of total hydrogen-bonding carbohydrate residue implicated in the interaction with VIP51.

**Table S6.** Specific hydrogen-bonding contacts between VIP51<sub>(6-30)</sub> and D21f2''Rd''

| Position <sup>a</sup> | VIP51f           | FTT | PO4 | DPO | PA1 | GCN | KDO | ΣAa <sup>b</sup> | %Aa <sup>c</sup> |
|-----------------------|------------------|-----|-----|-----|-----|-----|-----|------------------|------------------|
| 6                     | F                |     |     |     |     |     |     |                  |                  |
| 7                     | T                |     |     |     |     |     |     |                  |                  |
| 8                     | A                |     |     |     |     |     |     |                  |                  |
| 9                     | N                |     |     | 2   |     |     | 1   | 3                | 9.4              |
| 10                    | Y                |     |     |     |     |     |     |                  |                  |
| 11                    | T                |     |     |     |     |     |     |                  |                  |
| 12                    | R                | 1   |     |     |     |     |     | 1                | 3.1              |
| 13                    | L                |     |     |     |     |     |     |                  |                  |
| 14                    | R                | 2   |     | 1   | 1   |     |     | 4                | 12.5             |
| 15                    | R                |     |     |     |     |     | 1   | 1                | 3.1              |
| 16                    | Q                |     |     |     |     |     |     |                  |                  |
| 17                    | L                |     |     |     |     |     |     |                  |                  |
| 18                    | A                |     |     |     |     |     |     |                  |                  |
| 19                    | V                |     |     |     |     |     |     |                  |                  |
| 20                    | R                |     |     |     |     |     |     |                  |                  |
| 21                    | R                |     |     | 1   | 1   | 2   | 8   | 12               | 37.5             |
| 22                    | Y                |     |     |     |     |     |     |                  |                  |
| 23                    | L                |     |     |     |     |     |     |                  |                  |
| 24                    | A                |     |     |     |     |     |     |                  |                  |
| 25                    | A                |     |     |     |     |     |     |                  |                  |
| 26                    | I                |     |     |     |     |     |     |                  |                  |
| 27                    | L                |     |     |     |     |     |     |                  |                  |
| 28                    | G                |     |     |     |     |     |     |                  |                  |
| 29                    | R                | 2   | 1   |     |     |     |     | 3                | 9.4              |
| 30                    | R                |     |     |     | 1   |     | 7   | 8                | 25.0             |
|                       | ΣCh <sup>d</sup> | 5   | 1   | 4   | 3   | 2   | 17  |                  |                  |
|                       | %Ch <sup>e</sup> | 15  | 3   | 12  | 9   | 6   | 53  |                  |                  |

<sup>a</sup> Position of each amino acid in the sequence of the VIP51<sub>(6-30)</sub> molecule.

<sup>b</sup> Summation of hydrogen-bonding contacts between specific amino acids of VIP51<sub>(6-30)</sub> and D21''Ra''.

<sup>c</sup> % of total hydrogen-bonding amino acid implicated in the interaction between VIP51<sub>(6-30)</sub> and D21''Ra''.

<sup>d</sup> Summation of the total of hydrogen-bonding implicated in the interaction between each carbohydrate residue with VIP51<sub>(6-30)</sub>.

<sup>e</sup> % of total hydrogen-bonding carbohydrate residue implicated in the interaction with VIP51<sub>(6-30)</sub>.
